P3846

**The association between statin prescription, recurrent venous thromboembolism and bleeding events: from the COMMAND VTE Registry**

Y. Yoshikawa<sup>1</sup>, Y. Yamashita<sup>1</sup>, H. Mabuchi<sup>2</sup>, T. Morimoto<sup>3</sup>, H. Amano<sup>4</sup>, T. Takase<sup>5</sup>, S. Hiramori<sup>6</sup>, K. Kim<sup>7</sup>, M. Oj<sup>8</sup>, Y. Kobayashi<sup>9</sup>, M. Toyofuku<sup>10</sup>, T. Tada<sup>11</sup>, K. Murata<sup>12</sup>, J. Sakamoto<sup>13</sup>, T. Kimura<sup>1</sup>

<sup>1</sup>Kyoto University Graduate School of Medicine, Department of Cardiovascular Medicine, Kyoto, Japan; <sup>2</sup>Koto Memorial Hospital, Department of Cardiology, Higashiomi City, Japan; <sup>3</sup>Hyogo College of Medicine, Department of Clinical Epidemiology, Nishinomiya, Japan; <sup>4</sup>Kurashiki Central Hospital, Department of Cardiovascular Medicine, Kurashiki, Japan; <sup>5</sup>Kinki University, Department of Cardiology, Osaka, Japan; <sup>6</sup>Kokura Memorial Hospital, Department of Cardiology, Kokura, Japan; <sup>7</sup>Kobe City Medical Center General Hospital, Department of Cardiovascular Medicine, Kobe, Japan; <sup>8</sup>Japanese Red Cross Otsu Hospital, Department of Cardiology, Otsu, Japan; <sup>9</sup>Osaka Red Cross Hospital, Department of Cardiovascular Center, Osaka, Japan; <sup>10</sup>Japan Red Cross Society Wakayama Medical Center, Department of Cardiology, Wakayama, Japan; <sup>11</sup>Shizuoka General Hospital, Department of Cardiology, Shizuoka, Japan; <sup>12</sup>Shizuoka City Hospital, Department of Cardiology, Shizuoka, Japan; <sup>13</sup>Tenri Hospital, Department of Cardiology, Tenri, Japan

On behalf of The COMMAND VTE Registry investigators

**Background:** Statin prevents occurrence and recurrence of atherosclerotic events. With regard to venous thromboembolism (VTE), a randomized controlled trial suggested that statin reduced occurrence of VTE, whereas its usefulness as secondary prevention of VTE remains to be elucidated.

**Purpose:** This study aimed to assess the association between statin prescription, recurrent VTE and bleeding events in patients with VTE.

**Methods:** The COMMAND VTE Registry is a multicentre registry enrolling consecutive 3027 patients with acute symptomatic VTE among 29 centres in Japan. We divided the cohort into the patients who were prescribed statin (N=437) and those not (N=2590), and compared the two groups. We assessed hazard ratios (HRs) of those with statin relative to those without for long-term clinical outcomes (recurrent symptomatic VTE and International Society of Thrombosis and Hemostasis [ISTH] major bleeding). Because the durations of anticoagulation therapy were widely different between the two groups, we constructed Cox's proportional hazard model incorporating status of anticoagulation during the follow-up period as a time-varying covariate. Also, because the incidences of death were strikingly different between the two groups due to the difference in the prevalence

of active cancer, we used Fine-Gray's subdistribution hazard model in the presence of competing risks. We incorporated clinically relevant factors into these two models as covariates (10 factors for recurrent VTE and 11 for major bleeding).

**Results:** The statin group was significantly older than the non-statin group (statin 71.2±11.8 vs. non-statin 66.5±15.8, P<0.001). The prevalence of active cancer in the statin group was less than one-half of that in the non-statin group (12% vs. 25%, P<0.001), and the cumulative 3-year incidence of death was significantly lower in the statin group than in the non-statin group (12.8% vs. 26.1%, log-rank P<0.001). The table shows the adjusted HRs of the statin group relative to the non-statin group. The HRs of the statin group relative to non-statin group for recurrent VTE were significantly low, but those for major bleeding were insignificant.

**Conclusions:** Prescription of statin was associated with significantly low risks for recurrent VTE, whereas that was not for major bleeding events. Statin could be a potential treatment option for secondary prevention of VTE.

Adjusted hazard ratios

| Outcome measures | Model 1              | P value | Model 2              | P value |
|------------------|----------------------|---------|----------------------|---------|
|                  | Adjusted HR [95% CI] |         | Adjusted HR [95% CI] |         |
| Recurrent VTE    | 0.59 [0.36–0.98]     | 0.042   | 0.53 [0.32–0.89]     | 0.02    |
| Major bleeding   | 0.87 [0.60–1.24]     | 0.43    | 0.997 [0.69–1.43]    | 0.99    |

Model 1 derived from Cox's model with time-varying covariate of anticoagulation status. Model 2 derived from Fine-Gray's model.

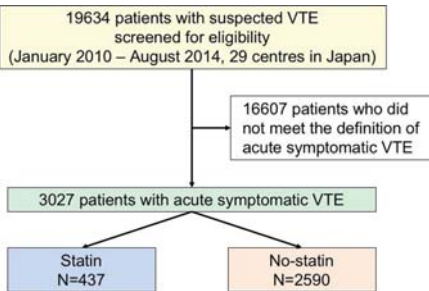

Study flowchart
